# Supplementary material
Source: PubMed Central journal article supplement (PMC1785396)
Supplement: plntcell_tpc.106.046953_2.pdf [file plntcell_tpc.106.046953_2.pdf]

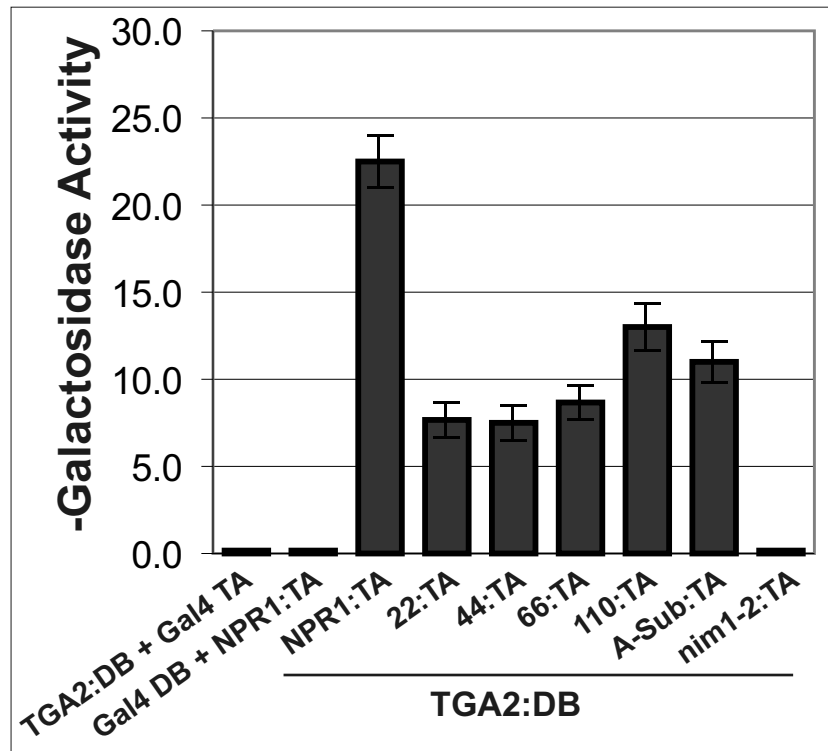

**Supplemental Figure 2.** The BTB/POZ Mutants of NPR1 Interact with TGA2 in Yeast Two-Hybrid Assays.

Quantitative yeast two-hybrid assays illustrating the interaction between TGA2 produced as a Gal4 DB fusion (TGA2:DB) co-expressed with NPR1, nim1-2, NPR1 lacking the first 22, 44, 66, or 110 amino acids ( 22, 44, 66, 110, respectively), or NPR1 mutated in the core of the BTB/POZ domain (A-Sub) expressed as Gal4 TA fusions (:TA). TGA2:DB co-expressed with Gal4TA and Gal4DB co-expressed with NPR1:TA served as negative controls. Values represent averages  $\pm$  1 SD.
